# Supplementary material for: A treponemal genome from an historic plague victim supports a recent emergence of yaws and its presence in 15th century Europe
Source: PubMed Central journal article supplement (PMC7290034; doi:10.1038/s41598-020-66012-x), 2020-06-11
Supplement: 41598_2020_66012_MOESM2_ESM.pdf [file 41598_2020_66012_MOESM2_ESM.pdf]

1 **Supplementary Information**

2

3 A treponemal genome from an historic plague victim supports a recent emergence of yaws  
4 and its presence in 15<sup>th</sup> century Europe

5

6 Karen Giffin<sup>1\*</sup>, Aditya Kumar Lankapalli<sup>1\*</sup>, Susanna Sabin<sup>1</sup>, Maria A. Spyrou<sup>1</sup>, Cosimo Posth<sup>1</sup>,  
7 Justina Kozakaitė<sup>2</sup>, Ronny Friedrich<sup>3</sup>, Žydrūnė Miliauskienė<sup>2</sup>, Rimantas Jankauskas<sup>2</sup>, Alexander  
8 Herbig<sup>1</sup>, and Kirsten I. Bos<sup>1</sup>

9

10 <sup>1</sup>Max Planck Institute for the Science of Human History, Jena, Germany

11 <sup>2</sup>Vilnius University, Vilnius, Lithuania

12 <sup>3</sup>Curt-Engelhorn-Zentrum Archäometrie, Mannheim, Germany

## 13 DNA extraction and qPCR Screening

14

15 Sampling, DNA extraction, qPCR reaction preparation, library preparation and indexing  
16 reaction preparation were performed in the ancient DNA clean lab facilities of the Max  
17 Planck Institute for the Science of Human History. All amplifications were carried out in the  
18 modern DNA lab facilities of this institution.

19

20 One tooth from each of 26 individuals was sectioned, and the pulp chamber was drilled  
21 using a Dremel tool at low setting affixed with a grout-cutting bit. DNA was extracted from  
22 ca. 50 mg of powder using a protocol designed to increase the recovery of short fragments,  
23 which are typical of ancient DNA<sup>1</sup>. The extraction protocol was modified as per Spyrou et al.,  
24 2019. Two extraction blanks were analyzed along with each set of 10 samples, the first as a  
25 reagent blank, and the second as a process blank. An inhibition test<sup>2</sup> was performed to rule  
26 out the presence of PCR-inhibiting components by spiking 2  $\mu$ L of sample extract into  
27 Illumina library qPCR reactions, with known amounts of standard template molecules, to  
28 record deviations from the anticipated amplification behaviour. No inhibition was detected  
29 via this method. Reaction chemistry for the *pla* qPCR assay for detection of *Y. pestis* PCP1  
30 plasmid DNA was performed without deviation<sup>3</sup>. Results of the *pla* assay can be found in  
31 Figures S1 and S2, and Table S1.

32

33

## 34 Library preparation and shotgun sequencing

35

### 36 *i) Library preparation and sequencing*

37 Double-stranded Illumina libraries were prepared for all 26 individuals and their associated  
38 negative controls using 10  $\mu$ L of DNA extract following established protocols<sup>4</sup>. Additionally,  
39 for the 6 putative positive plague samples, double-stranded libraries were prepared using  
40 40  $\mu$ L of DNA extract to increase template. Prior to adaptor ligation, each enriched library  
41 was treated with uracil-DNA-glycosylase (UDG) and Endonuclease VIII (New England Biolabs)  
42 to repair damaged DNA bases<sup>5,6</sup>. Two library blanks were analyzed along with each set of  
43 samples, the first a reagent blank, and the second a process blank. Quantification of  
44 libraries, indexing, and quantifications of the indexed libraries were performed as per  
45 Spyrou et al., 2019. The libraries of the UDG and nonUDG samples and blanks were  
46 amplified to individual concentrations of approximately  $1.3 \times 10^{13}$  DNA copies/ $\mu$ L using  
47 Herculase II Fusion DNA Polymerase (Agilent), purified as per Spyrou et al. (2019). Samples  
48 and blanks were pooled separately to total concentrations of approximately 10nM for  
49 Illumina shotgun sequencing. Concentrations were measured on a TapeStation 4200  
50 (Agilent). Aliquots of the amplified UDG and nonUDG libraries for the 6 putative plague  
51 positives and their associated blanks were further amplified for capture to a concentration  
52 of 200-400 ng/ $\mu$ L as per Spyrou et al. (2019). Concentrations of capture libraries were  
53 measured on a Nanodrop 8000 (Thermo Scientific). In-solution *Y. pestis* capture was

54 performed as previously described<sup>7</sup>. Samples were captured in individual wells, but blanks  
55 were pooled and captured together separately from the samples.

56

57 Shotgun libraries and capture products were sequenced to a depth of approximately 10  
58 million reads on an Illumina HiSeq4000 using a 50 bp paired-end kit. Screening and captured  
59 blanks were sequenced to a depth of approximately 2 million on an Illumina NextSeq500 on  
60 either a 75 bp paired-end mid-output kit or on a 75bp single-read kit, except for the *T.*  
61 *pallidum* capture blanks for the first tooth from AGU007, which were sequenced to a depth  
62 of 2 million reads on an Illumina HiSeq4000 using a 75bp single-read kit.

63

#### 64 *ii) Illumina read processing*

65 Sequenced shotgun libraries and blanks were demultiplexed and mapped to the human  
66 genome (hg19) in EAGER v1.92 to evaluate aDNA preservation<sup>8</sup>. In EAGER, reads had the  
67 adapters clipped, and paired reads were merged using AdapterRemoval v2.2<sup>9</sup>. Reads were  
68 filtered for a length of  $\geq 30$  bp and a minimum base quality of 20. Mapping was performed  
69 by BWA version 0.7.12 with a seed length (*-l*) of 32 and a mapping stringency setting of 0.01  
70 (*-n*). We removed read alignments with a mapping quality (*-q*) below 20 using SAMtools  
71 (<http://samtools.sourceforge.net/>). Duplicates were removed with MarkDuplicates  
72 (<http://broadinstitute.github.io/picard/>) and mapDamage v2.0 was used to examine DNA  
73 damage<sup>10</sup>. The 26 samples had 373 – 1,090,755 DNA fragments mapping to hg19 after  
74 quality filtering and duplicate removal, and % endogenous DNA ranging from 0.01 to 32.61  
75 (Table S2). Negative controls showed between 90 and 24,782 fragments mapping to hg19  
76 after quality filtering (Table S2).

77

78 Shotgun libraries for samples and blanks, both UDG and nonUDG, were mapped in EAGER  
79 against the CO92 reference genome for *Y. pestis* (NC\_003143.1) as a verification of the qPCR  
80 screening results<sup>11</sup>. EAGER was applied as described above, however, the BWA mapping  
81 parameters were *-l* = 16, *-n* = 0.01 and read alignments with a mapping quality below 37  
82 were removed. Results are presented in Table S3.

83

#### 84 *iii) qPCR re-evaluation*

85 On account of the unexpectedly high number of mapping *Y. pestis* fragments in individual  
86 AGU007, re-examination of the qPCR assay results revealed that AGU007 had a signal that  
87 had been initially dismissed. AGU007's amplification curve indicated a quantity below the  
88 lowest standard of 0.2 copies/ $\mu$ L (Figure S1, Table S1), and the melting peak signal was also  
89 very low as compared to the amplification standards and the other samples (Figure S2).

90

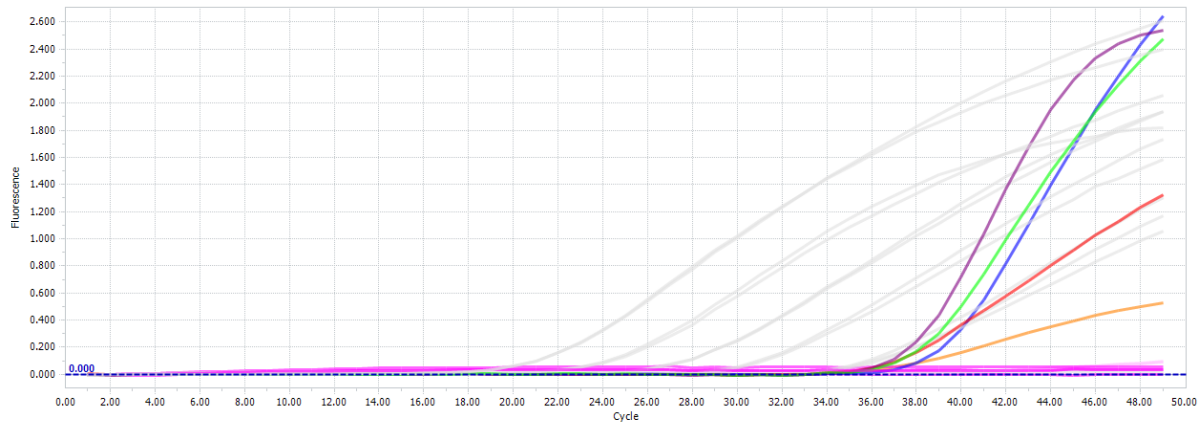

91  
92  
93  
94  
95  
96  
97

Figure S1 – Amplification curves of pla Assay. Curves in grey are *pla* standards. Purple, green, blue, red and orange curves are AGU010, AGU009, AGU013, AGU003 and AGU007, respectively. Extraction and qPCR blanks are shown in pink.

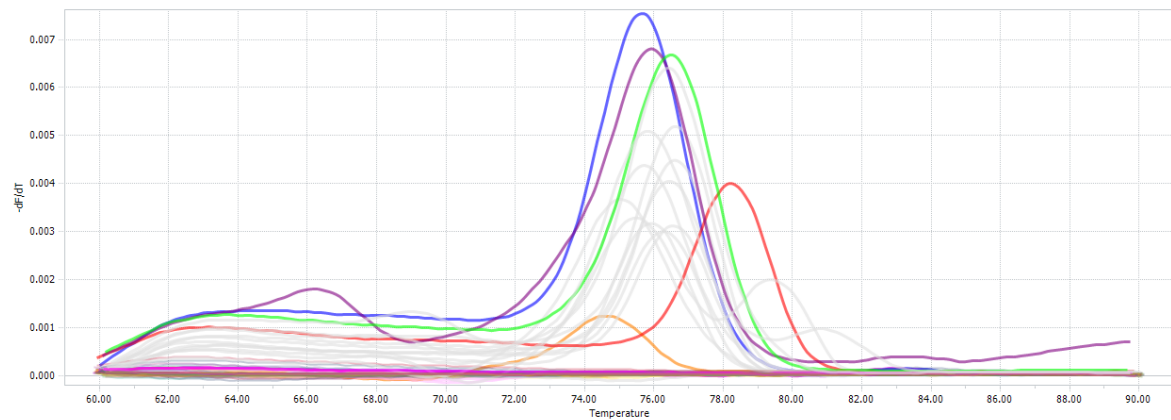

98  
99

Figure S2 – Melting peaks of pla Assay. Curves in grey are *pla* standards. Purple, green, blue, red and orange curves are AGU010, AGU009, AGU013, AGU003 and AGU007, respectively. Extraction and qPCR blanks are shown in pink.

103

104 A UDG library from 40  $\mu$ L of extract was prepared for AGU007 and was shotgun sequenced  
105 on an Illumina HiSeq 4000 with a 75bp single end kit. Mapping to hg19 and *Y. pestis* was  
106 carried out as previously described, though with more stringent parameters ( $-l$  32,  $-n$  0.1,  $-q$   
107 37) for the *Y. pestis* mapping (Table S3).

108

### 109 Pathogen Screening in HOPS

110 Libraries were screened for the presence of ancient pathogens using the MEGAN Alignment  
111 Tool (MALT) as part of the Heuristic Operations for Pathogen Screening (HOPS) pipeline<sup>12,13</sup>.  
112 The MALT database used for screening was constructed from a custom RefSeq Genome set  
113 in November 2017 that contained bacteria, viruses, and eukaryotes  
114 (<ftp://ftp.ncbi.nlm.nih.gov/genomes/refseq/>). *Y. pestis* signals were observed in the  
115 nonUDG library of AGU007, and in both the UDG-treated and untreated libraries for

116 AGU010, AGU020 and AGU025. Contrary to the qPCR assay, no *Y. pestis* signals were  
 117 observed in either the UDG-treated or untreated libraries for AGU003, AGU009, and  
 118 AGU013, indicating these were likely false positives.

119  
 120 Aside from *Y. pestis*, numerous reads were assigned to other pathogenic taxa, including oral  
 121 microorganisms (Figure S3). Verification of these signals would require targeted enrichment  
 122 for species and strains of the relevant taxa, and was not pursued here.

123  
 124 In addition to *Y. pestis*, the UDG library for AGU007 also demonstrated a signal for  
 125 *Treponema pallidum* that had not been observed in the initial screening of the nonUDG  
 126 library. Closer examination of the MALT data of the nonUDG library disclosed the presence  
 127 of 7 fragments matching to *T. pallidum* and 11 fragments matching to the *Treponema* genus  
 128 (Figure S3). This was not reported as positive identification by HOPS since the level of  
 129 damage in the reads precluded proper evaluation of taxon assignment.

130

| Organism                                   | AGU007.A |     | AGU010.A |     | AGU020.A |     | AGU025.A |      |
|--------------------------------------------|----------|-----|----------|-----|----------|-----|----------|------|
|                                            | nonUDG   | UDG | nonUDG   | UDG | nonUDG   | UDG | nonUDG   | UDG  |
| <i>Yersinia pseudotuberculosis</i> complex | 90       | 83  | 29       | 30  | 36       | 38  | 30       | 26   |
| <i>Yersinia pestis</i>                     | 19       | 17  | 9        | 10  | 8        | 8   | 9        | 7    |
| <i>Tannerella forsythia</i>                |          |     |          |     |          |     | 1055     | 1602 |
| <i>Treponema pallidum pallidum</i>         | 7        | 12  |          |     |          |     |          |      |
| <i>Treponema</i>                           | 11       | 21  |          |     |          |     |          | 18   |
| <i>Streptococcus anginosus</i>             |          |     |          |     |          |     | 4        |      |
| <i>Streptococcus agalactiae</i>            |          |     |          |     |          |     | 2        |      |
| <i>Streptococcus</i>                       |          |     |          |     |          |     | 15       |      |
| <i>Schistosoma mansoni</i>                 |          |     |          |     |          |     | 2        |      |
| <i>Salmonella enterica enterica</i>        |          |     |          |     |          |     |          | 9    |
| <i>Porphyromonas gingivalis</i>            |          |     |          |     |          |     | 118      | 159  |
| <i>Parvimonas micra</i>                    |          |     |          |     |          |     | 160      | 226  |
| <i>Neisseria</i>                           |          |     |          |     |          | 18  |          | 11   |
| <i>Mycobacterium tuberculosis</i> complex  |          |     |          |     | 5        |     |          |      |
| <i>Mycobacterium leprae</i>                |          |     |          |     | 4        |     |          |      |
| <i>Mycobacterium intracellulare</i>        | 26       |     |          |     |          |     |          |      |
| <i>Escherichia coli</i>                    |          |     | 260      | 228 |          |     |          |      |
| <i>Enterobius vermicularis</i>             |          | 115 |          | 13  |          |     |          |      |
| <i>Clostridium botulinum</i> BKT015925     |          |     |          |     |          |     | 5        |      |
| Borreliaceae                               |          |     |          |     |          |     |          | 2    |

131

132

133 Figure S3 – Pathogen screening data produced in HOPS from the putative *Y. pestis* positive screening libraries.  
 134 Numbers in each cell correspond to assigned reads. Cell fill colour indicates degree of taxon assignment  
 135 evaluation: gold pass the set edit distance filter, green pass this filter and also have terminal C to T damage,  
 136 and blue shows that reads with terminal C to T damage pass the edit distance filter. Grey indicates no positive  
 137 taxon assignment evaluation in HOPS.

138 Both the untreated and UDG-treated libraries were mapped in EAGER against the Nichols  
 139 syphilis reference genome (NC\_021490.2) using the same programs and parameters as  
 140 previously described for mapping to CO92<sup>14</sup>. The untreated library was found to contain 27  
 141 mapping fragments after duplicate removal and quality filtering and the UDG-treated library  
 142 was determined to have 36 mapping fragments following duplicate removal and quality

143 filtering (Table S11). The other 25 AGU samples had mapping fragment numbers ranging  
144 from 0-8 after duplicate removal and quality filtering. Screening blanks were also mapped in  
145 EAGER using screening library parameters and programs, and were found to have 0-3  
146 fragments mapping to Nichols (NC\_021490.2) after duplicate removal and quality filtering,  
147 consistent with the other samples found to be negative via screening.

148

149 For targeted enrichment of *Treponema pallidum*, DNA probes were designed on the basis of  
150 *Treponema pallidum* subsp. *pallidum* strains Nichols (NC\_000919.1), SS14 (NC\_021508.1),  
151 Sea 81-4 (NZ\_CP003679.1), Mexico A (NC\_018722.1), *T. pallidum* subsp. *endemicum* strain  
152 Bosnia A (NZ\_CP007548.1), and *T. pallidum* subsp. *pertenue* strain Fribourg-Blanc  
153 (NC\_021179.1). The probes were designed with a 1bp tiling and a length of 52 bp with an  
154 additional 8bp linker sequence (CACTGCGG) as described in Fu et al. (2013)<sup>15</sup>. Duplicated  
155 probes and probes with low sequence complexity were removed. This resulted in 1,125,985  
156 unique probe sequences. This probe set was spread on two Agilent one-million feature  
157 SureSelect DNA Capture Arrays. The capacity of the two arrays was filled by randomly  
158 duplicating probes from the probe set. The arrays were turned into an in-solution DNA  
159 capture library as described elsewhere<sup>15</sup>.

160

161 The treated and untreated libraries for AGU007 and its associated blanks were then in-  
162 solution captured for whole genomic *Treponema pallidum* DNA using the capture library  
163 described above. The *T. pallidum*-captured untreated and UDG-treated libraries were  
164 captured in individual wells and the associated blanks were pooled and captured separately  
165 from the samples.

166

#### 167 **Mapping of captured products for *Y. pestis* and *T. pallidum* (first tooth)**

168

169 Reads from *Y. pestis*-captured samples were mapped in EAGER against the CO92 reference  
170 genome (NC\_003143.1)<sup>11</sup> with stringent BWA mapping parameters (*-l* 32, *-n* 0.1, *-q* 37).  
171 Samples had 119 – 156,123 fragments mapping to CO92 after quality filtering and duplicate  
172 removal, with mean genomic coverages ranging from 0 to 1.98-fold (Table S4 and S5).  
173 Untreated libraries showed expected damage patterns (Figure S4). Samples AGU003,  
174 AGU009 and AGU013 had mean genomic coverages of 0 – 0.01-fold following capture,  
175 supporting the negative MALT/HOPS results. Samples AGU010, AGU020 and AGU025 had  
176 low mean genomic coverages ranging from 0.28 to 0.77-fold. Captured blanks had between  
177 5 and 90 mapping fragments, with duplication (cluster) factors ranging from 2.3 to 2645.7,  
178 indicating that complexity of the library had been adequately explored. These numbers are  
179 consistent with previously reported *Y. pestis* capture blank data in Bos et al. 2016.

180

181 The *T. pallidum*-captured untreated and UDG-treated libraries for AGU007 were sequenced  
182 on a HiSeq4000 to a depth of approximately 40 million reads with a 75 bp paired-end kit.  
183 The samples were mapped in EAGER to the Nichols genome (NC\_021490.2) with the same

184 parameters as the *Y. pestis* mapping. The libraries had 31,882 and 126,552 mapping  
185 fragments, respectively, following duplicate removal and quality filtering (Table S12). The  
186 mean coverages of the untreated and UDG-treated libraries were 1.78X and 6.67X,  
187 respectively, with the untreated library displaying the expected aDNA damage pattern  
188 (Figure S5). The UDG-treated library covered 96.1% of the genome at 1X and 76.1% at 5X.  
189 Captured blanks, sequenced on a HiSeq4000 with a 75bp single read kit, had 4 or fewer  
190 reads mapping to the Nichols genome after quality filtering.

191

192

### 193 **Processing and analysis of Second Set of Teeth from AGU**

194

195 Further data analysis awaited the arrival of the second set of teeth: one each from  
196 individuals AGU007, AGU010, AGU020 and AGU025. Following arrival, sampling, DNA  
197 extraction, library preparation, indexing, amplification, and *Y. pestis* and *T. pallidum* capture  
198 protocols were followed as previously described. No qPCR screening was performed for  
199 these samples. Remaining aliquots of unindexed AGU010 and AGU020 UDG-treated libraries  
200 from the first tooth were indexed and captured as part of the same batch following the  
201 same processes. Untreated and UDG-treated screening libraries were sequenced on  
202 separate runs on a HiSeq4000 using single-end 75 bp kits. *Y. pestis*-captured libraries were  
203 paired end sequenced to a depth of 20 million reads on a NextSeq500 using a 75bp mid  
204 output kit and *T. pallidum*-captured libraries were sequenced to a depth of approximately  
205 40 million on a HiSeq4000 using a 75 bp paired-end kit. All negative controls were  
206 sequenced to a depth of approximately 2 million on separate NextSeq500 runs using 75 bp  
207 mid-output paired end kits.

208

209 Mapping of the untreated and UDG-treated libraries of the tooth samples to hg19 was  
210 performed following the same procedures described previously. Shotgun sequencing  
211 yielded endogenous DNA contents of 0.07-59%, which corresponded to 6,381 – 6,986,467  
212 mapping fragments after duplicate removal and quality filtering (Table S6). Both AGU007  
213 and AGU010 had better human DNA preservation in the second tooth, but the opposite was  
214 observed for AGU020 and 025. Negative controls showed between 683 and 6,886 fragments  
215 mapping to hg19 after quality filtering. Mapping of the untreated and UDG-treated shotgun  
216 libraries to the *Y. pestis* CO92 genome was also performed, yielding 22 – 6,394 mapping  
217 fragments following duplicate removal and quality filtering (Table S7). UDG-treated shotgun  
218 libraries were mapped using more stringent parameters than untreated shotgun libraries (*-l*  
219 32, *-n* 0.1 and *-q* 37, and *-l* 16, *-n* 0.01 and *-q* 37, respectively). Negative controls had 11 or  
220 fewer fragments mapping after quality filtering.

221

222 Mapping of shotgun libraries from the second set of teeth against the Nichols genome  
223 (NC\_021490.2) yielded 1 – 181 fragments following duplicate removal and quality filtering  
224 (Table S13). Mapping parameters used were the same as for the shotgun library mapping to

225 *Y. pestis*. Blanks showed no indication of the presence of *T. pallidum* DNA after quality  
226 filtering.

227

228 Shotgun libraries for these second teeth were all screened using MALT/HOPS. As expected  
229 both *T. pallidum* and *Y. pestis* were detected in the UDG-treated and untreated libraries for  
230 AGU007. *Y. pestis* was detected in AGU010, AGU020 and AGU025, though for AGU020 it  
231 was detected in only the UDG-treated library, suggesting that *Y. pestis* DNA levels were  
232 minimal.

233

234 In-solution *Y. pestis* capture was performed on all libraries and their associated blanks using  
235 previously described methods<sup>7</sup>. Libraries for AGU007 and its blanks were also captured for  
236 *T. pallidum* as described above. The captures for both *Y. pestis* and *T. pallidum* were initially  
237 sequenced together on an Illumina HiSeq4000. The *Y. pestis* captures were subsequently re-  
238 sequenced separately on an Illumina NextSeq500.

239

240 Mapping of the *Y. pestis*-captured samples and blanks in EAGER against CO92 yielded 3978 –  
241 2,344,695 mapping fragments and mean coverages of 0.04X to 38.01X after duplicate  
242 removal and quality filtering (Table S8). Captured nonUDG libraries showed the expected  
243 ancient DNA damage pattern (Figure S4). AGU020 had the lowest coverage, 0.04X and 0.09X  
244 for its untreated and UDG-treated libraries, respectively. By contrast, the UDG treated  
245 AGU007 had a mean coverage of 38.01-fold with 93.7% of the genome covered at 5-fold.  
246 AGU010 had a mean coverage of 20.76-fold with 92.0% of the genome covered at 5-fold.  
247 AGU025.B had a mean coverage of 14.36-fold with 92.1% of the genome covered at 5-fold.  
248 For maximum coverage, all available sequencing data for the first tooth of AGU020 from the  
249 UDG library aliquots of both captures were merged. This resulted in a coverage of 1.68-fold.  
250 *Y. pestis*-captured blanks had 3-24 fragments mapping to *Y. pestis* after duplicate removal  
251 and quality filtering, with cluster factors between 1 and 1092.

252

253 Verification of the presence of *Y. pestis* plasmids pMT1 and pCD1 was also performed.  
254 Mapping in EAGER using previous stringent parameters yielded coverages for the pMT1  
255 from 4.02 to 63.75-fold, with 6284 to 79,105 fragments mapping after quality filtering. As  
256 expected, the lowest values were observed for AGU020 and the highest for AGU007 (Table  
257 S9). No more than 4 uniquely mapping fragments were observed in the captured negative  
258 controls. Mapping to pCD1 displayed similar results with the lowest values found in  
259 AGU020, with 6983 unique mapping fragments and 6.08-fold coverage, and the highest in  
260 AGU007, with 68,941 uniquely mapping fragments covering the pCD1 at 80.90-fold (Table  
261 S10). No uniquely mapping fragments were found in the negative controls.

262

263 The *T. pallidum*-captured libraries of AGU007 and its associated blanks were mapped in  
264 EAGER against Nichols (NC\_021490.2) using the same parameters and programs as the *Y.*  
265 *pestis* captures. AGU007 had 146,398 – 330,505 fragments mapping after duplicate removal



266 and quality filtering, mean coverages of 9.3 to 21.3-fold and 92.1% to 97.6% of the genome  
 267 covered at 5-fold (Table S14). The nonUDG library showed the expected ancient DNA  
 268 damage pattern (Figure S5). One mapping fragment was detected in three of the captured  
 269 blanks after quality filtering. Each mapping fragment was analyzed using BLASTn and found  
 270 to map to regions conserved in multiple bacterial taxa. None of the top 10 matches were to  
 271 *T. pallidum*.  
 272

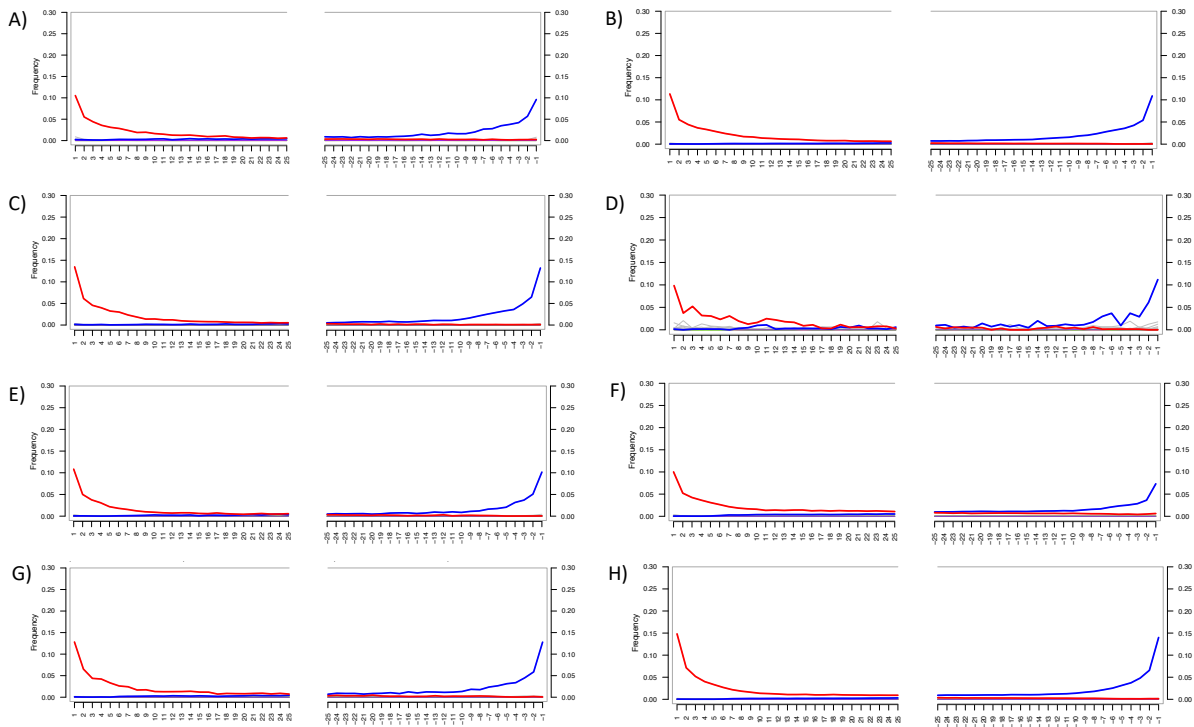

273  
 274 Figure S4 – *Y. pestis* DNA damage plots, generated by Mapdamage 2.0 in the EAGER pipeline, of captured  
 275 libraries of A) AGU010 tooth 1, B) AGU010 tooth 2, C) AGU020 tooth 1, D) AGU020 tooth 2, E) AGU025 tooth 1,  
 276 F) AGU025 tooth 2, G) AGU007 tooth 1 and H) AGU007 tooth 2.  
 277

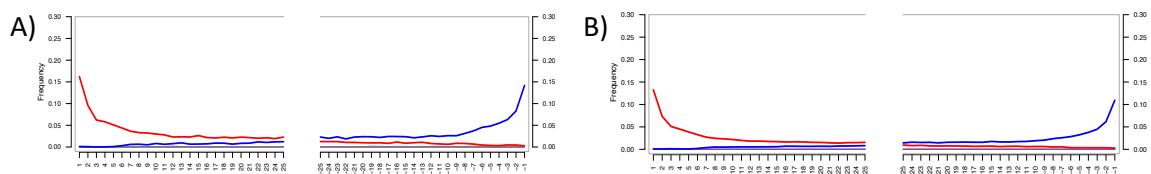

278  
 279 Figure S5 – *T. pallidum* DNA damage plots for captured libraries of A) AGU007 tooth 1 and B) AGU007 tooth 2.  
 280

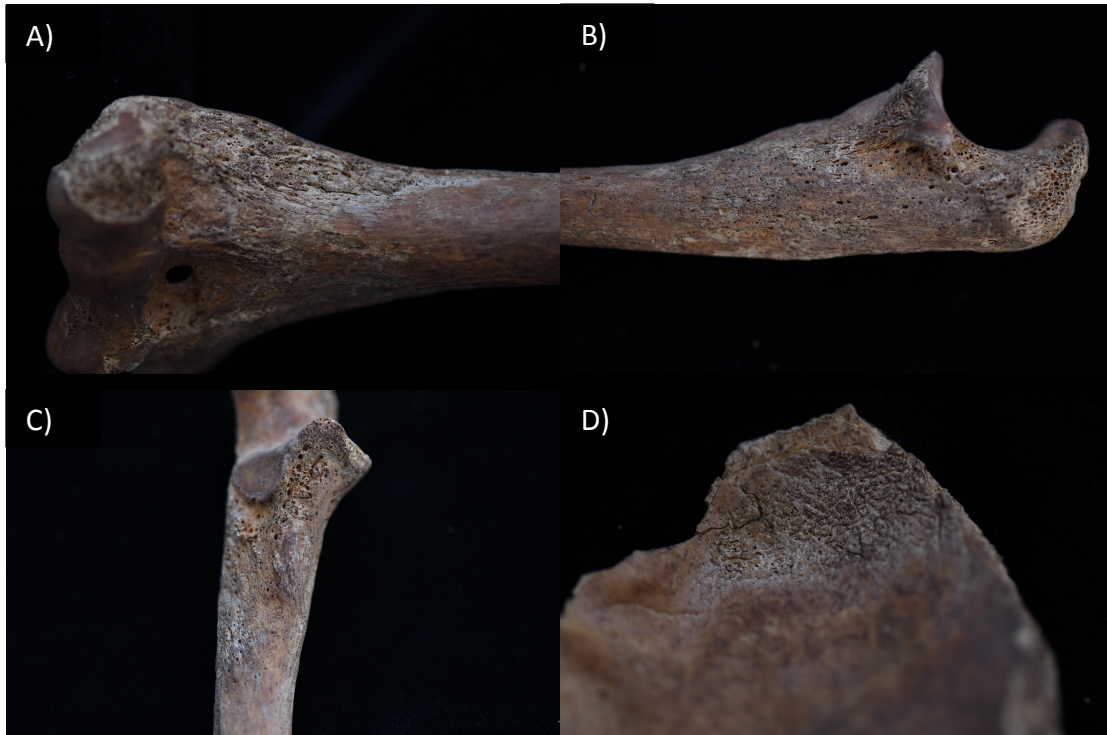

281

282

283 Figure S6 - Paleopathological Features of the skeleton of AGU007, A) right humerus, B) lateral view of right  
284 ulna, C) anterior view of the olecranon process of the right ulna, D) parietal bone (photographs courtesy of  
285 Justina Kozakaitė).

286

### 287 **Phylogenetic Analysis of *Yersinia pestis***

288 Phylogenetic assessment was made following methods described in the main manuscript

289 with a genome dataset defined in Table S15. *Y. pseudotuberculosis* was used as the

290 outgroup. A full phylogeny is presented in figure S7, and a zoomed in phylogeny of the

291 post-Black Death lineages only is shown in Figure 4.

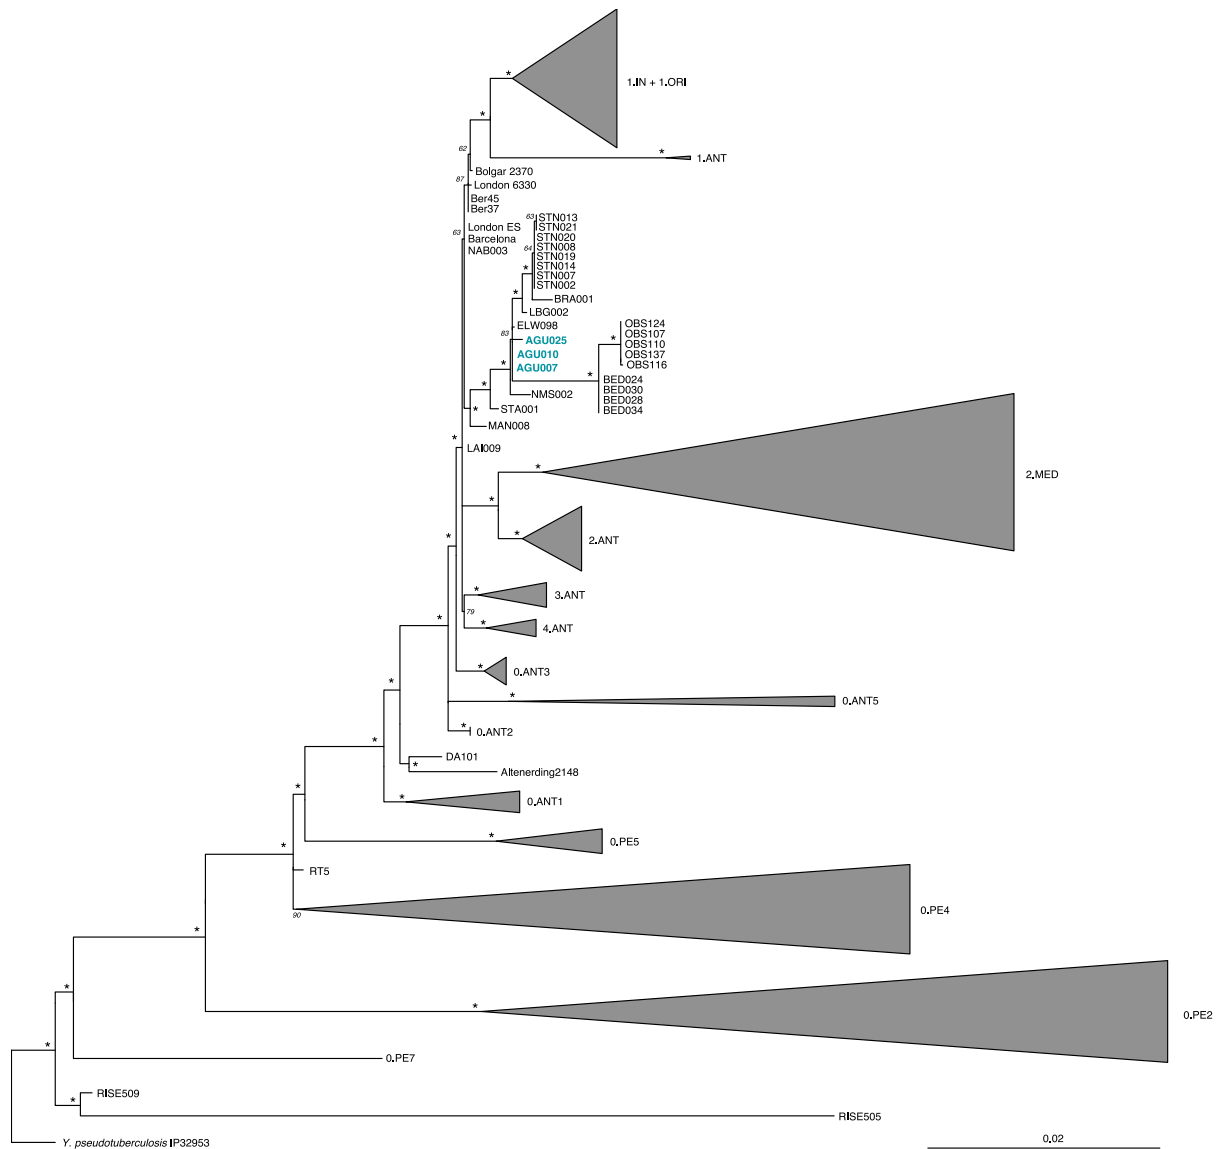

292

293

294

295

296

297

## 298 **Phylogenetic Analysis of *Treponema pallidum pertenuis***

299

300

301

302

303

304

305

Figure S7: Maximum likelihood tree of post-Black Death genomes of *Y. pestis*. Constructed from 275 genomes with the Generalised Time Reversible (GTR) model, 1000 bootstrap replicates, and a 98% partial deletion filter (considering 5801 SNPs). Bootstrap values of 95 or greater are indicated with an asterisk (\*). Scale denotes substitutions per site.

Sequencing reads for 70 samples from Arora *et al.*, 2016<sup>16</sup>, 8 samples from Marks *et al.* 2018<sup>17</sup>, and 8 samples from Knauf *et al.*, 2017<sup>18</sup> were analysed along with simulated reads generated from complete *T. pallidum* genomes downloaded from NCBI of 1<sup>st</sup> April, 2019 (Table S19). Each simulated read is 100bp long with 1bp tiling to the successive read. Adapters of sequenced reads were trimmed and poor-quality reads were filtered. Overlapping reads were merged and processed in EAGER version 1.92.58<sup>19</sup>. For AGU007,

306 raw reads from the first and second rounds of capture were filtered for sequencing quality  
307 independently. The resulting *fastq* reads were combined to form the raw data for the  
308 AGU007 merged dataset. These reads were mapped against reference genome *Treponema*  
309 *pallidum* subsp. *pallidum* Nichols (NC\_021490.2) with mapping quality of 37, seed length of  
310 32 with 0.1 fraction of missing alignment against the reference. Duplicated reads with the  
311 same 5' end, but of lower quality were excluded using MarkDuplicates  
312 (<http://broadinstitute.github.io/picard/>). Variants were called using GATK<sup>20</sup>. Using a  
313 threshold of five-fold mean coverage, 33 genomes covering 90 percent of the reference  
314 Nichols genome covered were of sufficient quality to be carried forward in our analysis, and  
315 their vcf files were combined and compared for downstream analysis. Variant positions  
316 were identified from a set of 2 *pallidum* genomes, 2 *endemicum* genomes and 25 *pertenue*  
317 genomes (Table S20) using MultiVCFAnalyzer  
318 (<https://github.com/alexherbig/MultiVCFAnalyzer>). SNP calling was based on a minimum  
319 coverage of five reads with a minimal mapping quality of 30 and at least 90 percent of the  
320 reads supporting the major allele; failure to meet this threshold resulted in assignment of an  
321 ambiguous base 'N' for both variant or invariant alleles with respect to the Nichols  
322 reference genome. Full genome alignment for these 29 genomes with respect to the Nichols  
323 reference and the SNP alignment from concatenated variant positions were generated. A  
324 phylogenetic tree was built in RAxML<sup>21</sup>, using the maximum likelihood approach with a  
325 GTR+GAMMA substitution model and eight gamma categories of evolutionary rates for  
326 1000 bootstrap replicates. ClonalFrameML<sup>22</sup> was used to detect possible sites of  
327 recombination from a full genome alignment. The maximum likelihood (ML) tree is provided  
328 as a clonal genealogy. We identified homoplastic SNPs between the yaws clade and the  
329 Bejel/SS14 clades by filtering for positions where the SS14 and/or the Bejel clade show the  
330 derived allele and at least one yaws strain shows the ancestral allele, while at least one  
331 other yaws strain shares the derived allele. We identified 13 positions that fulfill these  
332 criteria. These positions, in addition to those in recombinant positions identified by  
333 ClonalFrame, were excluded from further analysis  
334 ([https://github.com/AdityaLankapalli/Recombination\\_tools](https://github.com/AdityaLankapalli/Recombination_tools)). Positions with missing data  
335 ('N') were also removed. For these two datasets, ML trees were constructed as described  
336 above and trees were visualized (Figure 6).

337

338

### 339 **SNP effects**

340

341 The *Y. pestis* SNPs were called using UnifiedGenotyper in the Genome Analysis Toolkit  
342 (GATK) in EAGER, using the emit all sites option<sup>23</sup>. The resulting vcf file was processed with  
343 MultiVCFAnalyzer v0.85 (<https://github.com/alexherbig/MultiVCFAnalyzer>), to produce a  
344 SNP table<sup>24</sup>. Two hundred and seventy-five (275) genomes, consisting of both ancient and  
345 modern varieties, were used in the analysis,<sup>25-36</sup> (Table S15). MultiVCFAnalyzer parameters

346 included a minimum SNP coverage of 3-fold, genotyping quality of 30, and homozygosity  
347 calling at 90% support. An N was inserted in positions where no base call could be made  
348 based on the above parameters. Excluded regions are described elsewhere<sup>37</sup>. A total of  
349 6,949 variant positions were identified in this set (Table S16). The unique variants associated  
350 with AGU025 were analyzed using SnpEff<sup>38</sup> (Tables S17 and S18). The 4 SNPs in AGU025  
351 affected four different proteins. Two of these changes, at positions 4,047,235 and  
352 4,171,875, affecting the *yjcD* and *aceB* genes respectively, were synonymous. The SNP at  
353 position 3,789,518, present in only AGU025, affected the *mrcB* gene, which is a penicillin  
354 binding protein. The SNP at position 4,232,523 affects the *fre* gene - NADPH (FMN  
355 reductase) and is present in both AGU025 and AGU020. One unique SNP in AGU025 at  
356 position 1577025 was disregarded following visual inspection: It was restricted to the  
357 terminal ends of reads at the edge of an uncovered region of the genome, and hence is  
358 more likely to result from mismapping than actual biological variation.

359 The above procedures were followed for the treponemal dataset with 31 genomes (Table  
360 S19), with exclusion of SNPs filtered for sites identified as recombinant (see above). The  
361 unique variants observed in AGU007 were analyzed using SnpEff version 4.3t. The variant  
362 type, its annotation, and effect were estimated using SnpSift and snpEff respectively. The  
363 two unique variants 39267 and 523975 cause non-synonymous changes in the amino acid  
364 residues of genes TPANIC\_RS00150 (molecular chaperone GroEL), TPANIC\_RS02370  
365 (methyl-accepting chemotaxis protein) respectively.  
366

### 367 368 **Dating of the Yaws Clade**

369  
370 As input for TempEst, we used a maximum likelihood tree generated using RAxML<sup>39</sup> and an  
371 AGU007 tip date of 1464 CE (oldest sigma 2 values as determined from radiocarbon dating).  
372 The relationship between root-to-tip distance and date yielded an  $R^2$  of approximately 0.053  
373 (Figure S7). The MEGA maximum likelihood clock test was configured using MEGAproto with  
374 a general time reversible (GTR) substitution model with 4 gamma categories  
375

376 The BEAST model used for molecular dating was configured with BEAUti<sup>40</sup>. Tip sampling for  
377 AGU007 and correction for static positions in the genome was enabled through manual  
378 editing of the configuration file. The best-fitting substitution model for the dataset as  
379 calculated by ModelGenerator<sup>41</sup> was the transversion model (TVM), which assumes variable  
380 base frequencies, variable transversion rates, and equal transition rates. This was  
381 implemented in BEAUti by selecting the GTR model and fixing the AG operator, with a  
382 relaxed clock and constant coalescent tree model.

383  
384

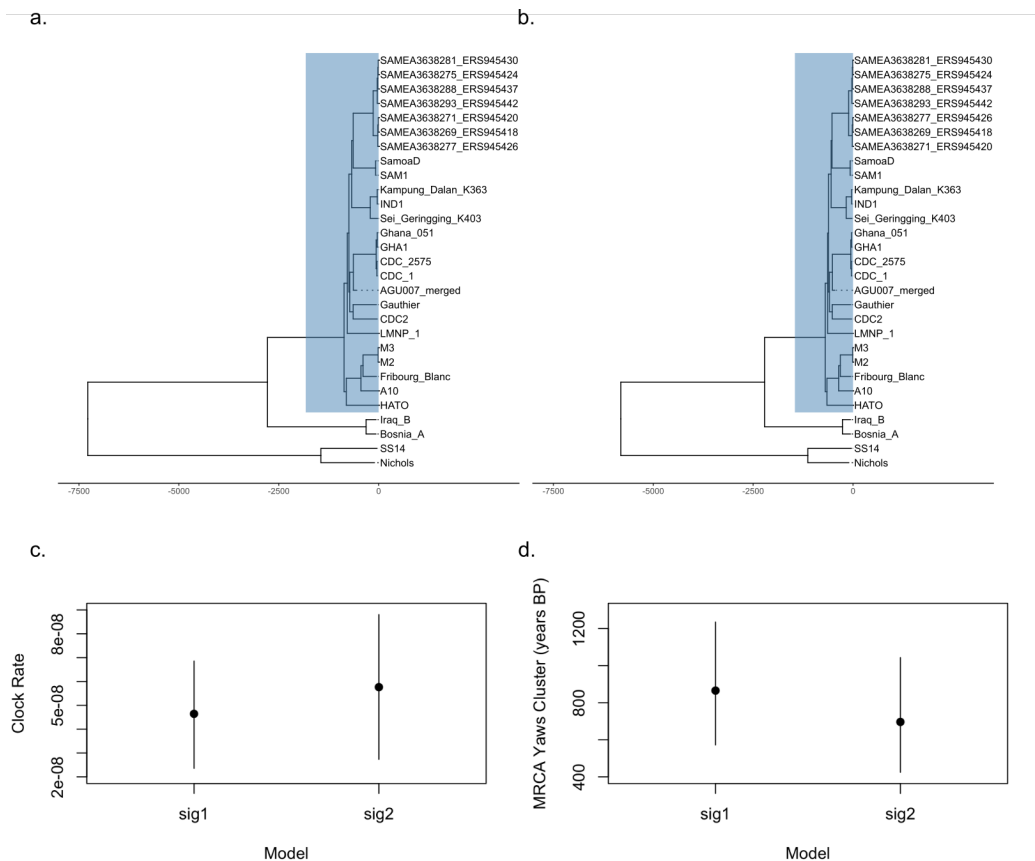

385  
386

387 Figure S8: Molecular dating of yaws cluster with BEAST. a) MCC tree for sig1 model with yaws cluster. b) MCC  
388 tree for sig2 model. In both panel (a) and panel (b) the yaws cluster (*Treponema pallidum pertenuae*) is  
389 highlighted in blue and the temporal scale at the bottom of each tree is in years before present. c) Comparison  
390 of clock rate estimates between models sig1 and sig2. The black dots indicate the estimated mean clock rate  
391 across the tree for each model, and the black lines represent the 95% HPD interval for each model. The y-axis  
392 is in substitutions per site per year. d) Comparison of the MRCA date for the yaws cluster according to each  
393 model. The black dots indicate the mean MRCA date, and the black lines represent the 95% HPD interval of the  
394 date for each model.

395

396

397

398

### 399 References cited

400

401 1 Dabney, J. *et al.* Complete mitochondrial genome sequence of a Middle Pleistocene  
402 cave bear reconstructed from ultrashort DNA fragments. *Proceedings of the National  
403 Academy of Sciences* **110**, 15758, doi:10.1073/pnas.1314445110 (2013).  
404 2 King, C. E., Debruyne, R., Kuch, M., Schwarz, C. & Poinar, H. N. A quantitative  
405 approach to detect and overcome PCR inhibition in ancient DNA extracts.  
406 *BioTechniques* **47**, 941-949, doi:10.2144/000113244 (2009).  
407 3 Schuenemann, V. J. *et al.* Targeted enrichment of ancient pathogens yielding the  
408 pPCP1 plasmid of *Yersinia pestis* from victims of the Black Death. *Proceedings of the  
409 National Academy of Sciences* **108**, E746, doi:10.1073/pnas.1105107108 (2011).

410 4 Meyer, M. & Kircher, M. Illumina sequencing library preparation for highly  
411 multiplexed target capture and sequencing. *Cold Spring Harb Protoc* **2010**,  
412 pdb.prot5448, doi:10.1101/pdb.prot5448 (2010).

413 5 Briggs, A. W. *et al.* Removal of deaminated cytosines and detection of in vivo  
414 methylation in ancient DNA. *Nucleic Acids Research* **38**, e87-e87,  
415 doi:10.1093/nar/gkp1163 (2009).

416 6 Rohland, N., Harney, E., Mallick, S., Nordenfelt, S. & Reich, D. Partial uracil–DNA–  
417 glycosylase treatment for screening of ancient DNA. *Philosophical Transactions of  
418 the Royal Society B: Biological Sciences* **370**, 20130624, doi:10.1098/rstb.2013.0624  
419 (2015).

420 7 Andrades Valtueña, A. *et al.* The Stone Age Plague and Its Persistence in Eurasia.  
421 *Current Biology* **27**, 3683-3691.e3688, doi:<https://doi.org/10.1016/j.cub.2017.10.025>  
422 (2017).

423 8 Peltzer, A. *et al.* EAGER: efficient ancient genome reconstruction. *Genome Biology*  
424 **17**, 60, doi:10.1186/s13059-016-0918-z (2016).

425 9 Lindgreen, S. AdapterRemoval: easy cleaning of next-generation sequencing reads.  
426 *BMC Research Notes* **5**, 337, doi:10.1186/1756-0500-5-337 (2012).

427 10 Jónsson, H., Ginolhac, A., Schubert, M., Johnson, P. L. F. & Orlando, L.  
428 mapDamage2.0: fast approximate Bayesian estimates of ancient DNA damage  
429 parameters. *Bioinformatics* **29**, 1682-1684, doi:10.1093/bioinformatics/btt193  
430 (2013).

431 11 Parkhill, J. *et al.* Genome sequence of *Yersinia pestis*, the causative agent of plague.  
432 *Nature* **413**, 523-527, doi:10.1038/35097083 (2001).

433 12 Hübner, R. *et al.* HOPS: automated detection and authentication of pathogen DNA in  
434 archaeological remains. *Genome Biology* **20**, 280, doi:10.1186/s13059-019-1903-0  
435 (2019).

436 13 Herbig, A. *et al.* MALT: Fast alignment and analysis of metagenomic DNA sequence  
437 data applied to the Tyrolean Iceman. *bioRxiv*, 050559, doi:10.1101/050559 (2016).

438 14 Pětrošová, H. *et al.* Resequencing of *Treponema pallidum* ssp. *pallidum* Strains  
439 Nichols and SS14: Correction of Sequencing Errors Resulted in Increased Separation  
440 of Syphilis *Treponema* Subclusters. *PLOS ONE* **8**, e74319,  
441 doi:10.1371/journal.pone.0074319 (2013).

442 15 Fu, Q. *et al.* DNA analysis of an early modern human from Tianyuan Cave, China.  
443 *Proceedings of the National Academy of Sciences* **110**, 2223,  
444 doi:10.1073/pnas.1221359110 (2013).

445 16 Arora, N. *et al.* Origin of modern syphilis and emergence of a pandemic *Treponema*  
446 *pallidum* cluster. *Nat Microbiol* **2**, 16245, doi:10.1038/nmicrobiol.2016.245 (2016).

447 17 Marks, M. *et al.* Diagnostics for Yaws Eradication: Insights From Direct Next-  
448 Generation Sequencing of Cutaneous Strains of *Treponema pallidum*. *Clin Infect Dis*  
449 **66**, 818-824, doi:10.1093/cid/cix892 (2018).

450 18 Knauf, S. *et al.* Nonhuman primates across sub-Saharan Africa are infected with the  
451 yaws bacterium *Treponema pallidum* subsp. *pertenue*. *Emerg Microbes Infect* **7**, 157,  
452 doi:10.1038/s41426-018-0156-4 (2018).

453 19 Peltzer, A. *et al.* EAGER: efficient ancient genome reconstruction. *Genome Biol* **17**,  
454 60, doi:10.1186/s13059-016-0918-z (2016).

- 455 20 DePristo, M. A. *et al.* A framework for variation discovery and genotyping using next-  
456 generation DNA sequencing data. *Nat Genet* **43**, 491-498, doi:10.1038/ng.806  
457 (2011).
- 458 21 Stamatakis, A. RAxML version 8: a tool for phylogenetic analysis and post-analysis of  
459 large phylogenies. *Bioinformatics* **30**, 1312-1313, doi:10.1093/bioinformatics/btu033  
460 (2014).
- 461 22 Didelot, X. & Wilson, D. J. ClonalFrameML: efficient inference of recombination in  
462 whole bacterial genomes. *PLoS Comput Biol* **11**, e1004041,  
463 doi:10.1371/journal.pcbi.1004041 (2015).
- 464 23 DePristo, M. A. *et al.* A framework for variation discovery and genotyping using next-  
465 generation DNA sequencing data. *Nature Genetics* **43**, 491, doi:10.1038/ng.806  
466 <https://www.nature.com/articles/ng.806#supplementary-information> (2011).
- 467 24 Bos, K. I. *et al.* Pre-Columbian mycobacterial genomes reveal seals as a source of  
468 New World human tuberculosis. *Nature* **514**, 494, doi:10.1038/nature13591  
469 <https://www.nature.com/articles/nature13591#supplementary-information> (2014).
- 470 25 Bos, K. I. *et al.* A draft genome of *Yersinia pestis* from victims of the Black Death.  
471 *Nature* **478**, 506, doi:10.1038/nature10549  
472 <https://www.nature.com/articles/nature10549#supplementary-information> (2011).
- 473 26 Feldman, M. *et al.* A High-Coverage *Yersinia pestis* Genome from a Sixth-Century  
474 Justinianic Plague Victim. *Molecular Biology and Evolution* **33**, 2911-2923,  
475 doi:10.1093/molbev/msw170 (2016).
- 476 27 Namouchi, A. *et al.* Integrative approach using *Yersinia pestis* genomes to revisit the  
477 historical landscape of plague during the Medieval Period. *Proceedings of the*  
478 *National Academy of Sciences* **115**, E11790, doi:10.1073/pnas.1812865115 (2018).
- 479 28 Eroshenko, G. A. *et al.* *Yersinia pestis* strains of ancient phylogenetic branch O.ANT  
480 are widely spread in the high-mountain plague foci of Kyrgyzstan. *PLOS ONE* **12**,  
481 e0187230, doi:10.1371/journal.pone.0187230 (2017).
- 482 29 Chain, P. S. G. *et al.* Complete Genome Sequence of *Yersinia pestis*; Strains Antiqua  
483 and Nepal516: Evidence of Gene Reduction in an Emerging Pathogen. *Journal of*  
484 *Bacteriology* **188**, 4453, doi:10.1128/JB.00124-06 (2006).
- 485 30 Kislichkina, A. A. *et al.* Nineteen Whole-Genome Assemblies of *Yersinia pestis*,  
486 Including Representatives of Biovars caucasica, talassica, hissarica, altaica,  
487 xilingolensis, and ulegeica. *Genome Announcements* **3**, e01342-01315,  
488 doi:10.1128/genomeA.01342-15 (2015).
- 489 31 Rasmussen, S. *et al.* Early Divergent Strains of *Yersinia pestis* in Eurasia 5,000 Years  
490 Ago. *Cell* **163**, 571-582, doi:<https://doi.org/10.1016/j.cell.2015.10.009> (2015).
- 491 32 Zhgenti, E. *et al.* Genome Assemblies for 11 *Yersinia pestis* Strains Isolated in the  
492 Caucasus Region. *Genome Announcements* **3**, e01030-01015,  
493 doi:10.1128/genomeA.01030-15 (2015).
- 494 33 Spyrou, M. A. *et al.* Phylogeography of the second plague pandemic revealed  
495 through analysis of historical *Yersinia pestis* genomes. *Nature Communications* **10**,  
496 4470, doi:10.1038/s41467-019-12154-0 (2019).
- 497 34 Spyrou, Maria A. *et al.* Historical *Y. pestis* Genomes Reveal the European Black Death  
498 as the Source of Ancient and Modern Plague Pandemics. *Cell Host & Microbe* **19**,  
499 874-881, doi:<https://doi.org/10.1016/j.chom.2016.05.012> (2016).



500 35 Bos, K. I. *et al.* Eighteenth century *Yersinia pestis* genomes reveal the long-term  
501 persistence of an historical plague focus. *Elife* **5**, e12994-e12994,  
502 doi:10.7554/eLife.12994 (2016).

503 36 Spyrou, M. A. *et al.* Analysis of 3800-year-old *Yersinia pestis* genomes suggests  
504 Bronze Age origin for bubonic plague. *Nature Communications* **9**, 2234,  
505 doi:10.1038/s41467-018-04550-9 (2018).

506 37 Spyrou, M. A. *et al.* A phylogeography of the second plague pandemic revealed  
507 through the analysis of historical *Y. pestis* genomes. *bioRxiv*, 481242,  
508 doi:10.1101/481242 (2018).

509 38 Cingolani, P. *et al.* A program for annotating and predicting the effects of single  
510 nucleotide polymorphisms, SnpEff. *Fly* **6**, 80-92, doi:10.4161/fly.19695 (2012).

511 39 Stamatakis, A. RAxML version 8: a tool for phylogenetic analysis and post-analysis of  
512 large phylogenies. *Bioinformatics* **30**, 1312-1313, doi:10.1093/bioinformatics/btu033  
513 (2014).

514 40 Bouckaert, R. *et al.* BEAST 2: A Software Platform for Bayesian Evolutionary Analysis.  
515 *PLOS Computational Biology* **10**, e1003537, doi:10.1371/journal.pcbi.1003537  
516 (2014).

517 41 Keane, T. M., Creevey, C. J., Pentony, M. M., Naughton, T. J. & McLnerney, J. O.  
518 Assessment of methods for amino acid matrix selection and their use on empirical  
519 data shows that ad hoc assumptions for choice of matrix are not justified. *BMC*  
520 *Evolutionary Biology* **6**, 29, doi:10.1186/1471-2148-6-29 (2006).  
521
